# Supplementary material for: Two novel mutations in PRPF3 causing autosomal dominant retinitis pigmentosa
Source: PubMed Central journal article supplement (PMC5122955; doi:10.1038/srep37840), 2016-11-25
Supplement: srep37840-s1.pdf [file srep37840-s1.pdf]

# Two novel mutations in *PRPF3* causing autosomal dominant retinitis pigmentosa

Zilin Zhong<sup>1, 2, \*</sup>, Min Yan<sup>3, \*</sup>, Wan Sun<sup>1, 2</sup>, Zehua Wu<sup>1, 2</sup>, Liyun Han<sup>1, 2</sup>, Zheng Zhou<sup>4</sup>, Fang Zheng<sup>3, \*</sup>, and Jianjun Chen<sup>1, 2, \*</sup>

**Table S1. Primers used for amplification and sequence analysis of human PRPF3.**

| Primers       | Forward (5'>3')         | Reverse (5'>3')         | Amplicon Length (bp) |
|---------------|-------------------------|-------------------------|----------------------|
| PRPF3_EX02    | AGTATTGAGTCCTGTTTGAGCT  | GGTGACTCAGTATGGTAGCC    | 428                  |
| PRPF3_EX03    | TCAAGGTAAACAGGTTGCTCT   | AGACAAAGCTGCCAATTATTTCT | 587                  |
| PRPF3_EX04    | GGAGGTGAGTTTTAGGCAGGA   | TACAGACCCATGCACCTTTTG   | 545                  |
| PRPF3_EX05-06 | TCCAGAGTCTCAATCATCACACT | GCCAGATCAGTAACATTCAAAGG | 847                  |
| PRPF3_EX07    | CTCAAGTGATCCCTCTGCCTT   | TCACGAAACCATCCTTACTCCA  | 632                  |
| PRPF3_EX08    | TGGAAGGTAGAGGTTGCTGTT   | CAGGACCTTGTGTACAGTTACT  | 499                  |
| PRPF3_EX09    | GAACATAGCGTCTGTCTAGCTG  | TGGGTAATGCTGCTCTAGAGA   | 398                  |
| PRPF3_EX10    | TTTTATTGCTGTCCGGGCC     | ACCAGAGTGTGTATGATCAGT   | 668                  |
| PRPF3_EX11-12 | GCTCTTTCAGTAGATGCTGTGA  | AGCTCTTGATCCACACTAGGG   | 825                  |
| PRPF3_EX13-14 | AGTAAATACCTCTCCCTGACTCT | GGCTCAAAGTCTAAACGGGTC   | 892                  |
| PRPF3_EX15    | TCCCAAAGTGCCTAGGACAAG   | CATTCCCGTTTCCAAGTCTCA   | 680                  |
| PRPF3_EX16    | CTGGGCACATGTCTCACAAT    | TCACCTGTAGACCCAACTCT    | 521                  |

**Note:** All primers were amplified using a touchdown protocol beginning at 64°C, decreasing by 0.5°C each cycle, until finishing at a final annealing temperature of 57°C.
